# Supplementary material
Source: HighWire-hosted journal article supplement (http://www.qdcxjkg.com/highwire/filestream/130085/field_highwire_adjunct_files/0/Supplementary_material_Jonkman_et_al.pdf)
Supplement: Supplementary_material_Jonkman_et_al.pdf [file Supplementary_material_Jonkman_et_al.pdf]

# **Characteristics of effective self-management interventions in patients with COPD: individual patient data meta-analysis**

Nini H Jonkman, Heleen Westland, Jaap CA Trappenburg, Rolf HH Groenwold, Erik WMA Bischoff, Jean Bourbeau, Christine E Bucknall, David Coultas, Tanja W Effing, Michael Epton, Frode Gallefoss, Judith Garcia-Aymerich, Suzanne M Lloyd, Evelyn M Monninkhof, Huong Q Nguyen, Job van der Palen, Kathryn L Rice, Maria Sedeno, Stephanie JC Taylor, Thierry Troosters, Nicholas A Zwar, Arno W Hoes, Marieke J Schuurmans

## **Supplementary Material**

## **Contents**

**Table S1:** Search syntax in PubMed.

**Table S2:** Baseline characteristics of patients included in individual patient data meta-analysis and published data of eligible studies that did not participate.

**Table S3:** Programme characteristics of the self-management interventions included in individual patient data meta-analysis and published data of eligible studies that did not participate.

**Table S4:** Sensitivity analysis on main outcomes by including published main effects of eligible studies without available individual patient data.

**Table S5:** Risk of bias assessment of studies included in individual patient data meta-analysis.

**Supplemental references**

**Table S1: Search syntax in PubMed.**

|                                                                                                                                                                                                                                                                                                                                                                                                                                                                                                                                                                                                                                                                                                                                                                                                                                                                                                                                                                                                                                                                                                                                                                                                                                                                                                                                                                                                                                                                                                                                                     |
|-----------------------------------------------------------------------------------------------------------------------------------------------------------------------------------------------------------------------------------------------------------------------------------------------------------------------------------------------------------------------------------------------------------------------------------------------------------------------------------------------------------------------------------------------------------------------------------------------------------------------------------------------------------------------------------------------------------------------------------------------------------------------------------------------------------------------------------------------------------------------------------------------------------------------------------------------------------------------------------------------------------------------------------------------------------------------------------------------------------------------------------------------------------------------------------------------------------------------------------------------------------------------------------------------------------------------------------------------------------------------------------------------------------------------------------------------------------------------------------------------------------------------------------------------------|
| <p>("pulmonary disease, chronic obstructive"[MeSH Terms] OR COPD[Title/Abstract] OR "chronic obstructive pulmonary disease"[Title/Abstract] OR "chronic obstructive airway disease"[Title/Abstract] OR "chronic airflow obstruction"[Title/Abstract] OR "chronic obstructive lung disease"[Title/Abstract] OR "chronic bronchitis"[Title/Abstract] OR bronchitis[Title/Abstract] OR emphysema[Title/Abstract] OR "lung emphysema"[Title/Abstract] OR "pulmonary emphysema"[Title/Abstract])</p> <p>OR "heart failure"[MeSH Terms] OR CHF[Title/Abstract] OR HF[Title/Abstract] OR "congestive heart failure"[Title/Abstract] OR "chronic heart failure"[Title/Abstract] OR "chronic cardiac failure" [Title/Abstract] OR "congestive cardiac failure"[Title/Abstract] OR "heart failure"[Title/Abstract] OR "cardiac failure"[Title/Abstract] OR "heart decompensation"[Title/Abstract]</p> <p>OR "diabetes mellitus, type 2"[MeSH Terms] OR "insulin resistance"[MeSH Terms] OR DMII[Title/Abstract] OR DM2[Title/Abstract] OR "type 2 diabetes"[Title/Abstract] OR "type ii diabetes"[Title/Abstract] OR "diabetes mellitus type 2"[Title/Abstract] OR NIDDM[Title/Abstract] OR "noninsulin dependent diabetes mellitus"[Title/Abstract] OR "non insulin dependent"[Title/Abstract] OR "noninsulin dependent"[Title/Abstract] OR noninsuldependent[Title/Abstract] OR non-insulin-dependent[Title/Abstract] OR "impaired glucose tolerance"[Title/Abstract] OR "insulin resistance"[Title/Abstract] OR "glucose intolerance"[Title/Abstract])</p> |
| <p>AND (self-management[MeSH Terms] OR self-care[MeSH Terms] OR patient-education[MeSH Terms] OR "behavior therapy"[MeSH Terms] OR self-manag*[Title/Abstract] OR self-car*[Title/Abstract] OR self-monitor*[Title/Abstract] OR self-administration[Title/Abstract] OR self-medication[Title/Abstract] OR educate[Title/Abstract] OR educated[Title/Abstract] OR education[Title/Abstract] OR educating[Title/Abstract] OR educational[Title/Abstract] OR instructed[Title/Abstract] OR instruction[Title/Abstract] OR instructions[Title/Abstract] OR instructional[Title/Abstract] OR trained[Title/Abstract] OR "action plan*"[Title/Abstract] OR patient-educat*[Title/Abstract] OR patient-cent*[Title/Abstract] OR patient-focus*[Title/Abstract] OR "behavior therapy"[Title/Abstract] OR "behaviour therapy"[Title/Abstract] OR empowerment[Title/Abstract])</p>                                                                                                                                                                                                                                                                                                                                                                                                                                                                                                                                                                                                                                                                            |
| <p>AND ("randomized controlled trial"[MeSH Terms] OR "randomised controlled trial"[MeSH Terms] OR "controlled clinical trial"[MeSH Terms] OR "random allocation"[MeSH Terms] OR "evaluation studies"[MeSH Terms] OR "intervention studies"[MeSH Terms] OR "randomized controlled trial"[Title/Abstract] OR "randomised controlled trial"[Title/Abstract] OR "controlled clinical trial"[Title/Abstract] OR "clinical trial"[Title/Abstract] OR "random allocation"[Title/Abstract] OR intervention[Title/Abstract] OR trial[Title/Abstract] OR trials[Title/Abstract] OR random[Title/Abstract] OR randomized[Title/Abstract] OR randomised[Title/Abstract] OR randomization[Title/Abstract] OR randomisation[Title/Abstract] OR randomizing[Title/Abstract] OR randomising[Title/Abstract] OR randomly[Title/Abstract] OR allocate[Title/Abstract] OR allocated[Title/Abstract] OR allocating[Title/Abstract] OR allocation[Title/Abstract])</p>                                                                                                                                                                                                                                                                                                                                                                                                                                                                                                                                                                                                   |

**Table S2: Baseline characteristics of patients included in individual patient data meta-analysis and published data of eligible studies that did not participate.**

| Characteristic                      | Individual patient data of included studies (n=3282) | Published data of non-participating studies (n=1076) |
|-------------------------------------|------------------------------------------------------|------------------------------------------------------|
| Sex                                 |                                                      |                                                      |
| <i>Male</i>                         | 65.6%                                                | 77.8%                                                |
| <i>Female</i>                       | 34.5%                                                | 22.3%                                                |
| Age                                 | 68.1 ± 9.6                                           | 67.3                                                 |
| FEV1%pred                           | 47.7 ± 18.9                                          | 45.6                                                 |
| Dyspnoea                            |                                                      |                                                      |
| <i>Low level of breathlessness</i>  | 44.7%                                                | No comparable data published                         |
| <i>High level of breathlessness</i> | 55.3%                                                | No comparable data published                         |
| Level of education                  |                                                      |                                                      |
| <i>Primary education or below</i>   | 38.9%                                                | 44.6%                                                |
| <i>Secondary education</i>          | 44.6%                                                | 46.1%                                                |
| <i>Higher education</i>             | 16.6%                                                | 9.3%                                                 |
| Current smoker                      | 28.6%                                                | 26.5%                                                |

**Table S3: Programme characteristics of the self-management interventions included in individual patient data meta-analysis and published data of eligible studies that did not participate.**

| Study                                                            | Year recruitment | Standardised training | Multidisciplinary team | Peer contact | Keeping logs | Goal-setting | Problem-solving | Support allocation | Easy telephone access | Action plan with prescription |
|------------------------------------------------------------------|------------------|-----------------------|------------------------|--------------|--------------|--------------|-----------------|--------------------|-----------------------|-------------------------------|
| <i>Studies included in individual patient data meta-analysis</i> |                  |                       |                        |              |              |              |                 |                    |                       |                               |
| Gallefoss et al. 1999 <sup>1</sup>                               | 1994             | X                     | X                      | X            | X            |              |                 |                    |                       | X                             |
| Bourbeau et al 2003 <sup>2</sup>                                 | 1998             | X                     | X                      |              |              |              | X               |                    | X                     | X                             |
| Monninkhof et al. 2003 <sup>3</sup>                              | 1999             | X                     | X                      | X            | X            |              | X               | X                  | X                     | X                             |
| Coultas et al. 2005a <sup>4</sup>                                | 2000             | X                     |                        |              |              |              |                 |                    |                       |                               |
| Coultas et al. 2005b <sup>4</sup>                                | 2000             | X                     |                        |              |              |              |                 |                    |                       |                               |
| McGeoch et al. 2006 <sup>5</sup>                                 | 2002             | X                     |                        |              |              |              |                 |                    |                       | X                             |
| Bischoff et al. 2012a <sup>6</sup>                               | 2004             | X                     |                        |              |              |              | X               |                    | X                     | X                             |
| Bischoff et al. 2012b <sup>6</sup>                               | 2004             |                       |                        |              |              |              |                 |                    |                       |                               |
| Effing et al. 2009a <sup>7</sup>                                 | 2004             | X                     | X                      | X            | X            | X            | X               | X                  | X                     | X                             |
| Effing et al. 2009b <sup>7</sup>                                 | 2004             | X                     | X                      | X            | X            | X            | X               | X                  | X                     | X                             |
| Effing et al. 2009c <sup>7</sup>                                 | 2004             | X                     | X                      | X            | X            | X            |                 | X                  |                       |                               |
| Rice et al. 2010 <sup>8</sup>                                    | 2004             | X                     |                        | X            |              |              |                 |                    | X                     | X                             |
| Casas et al. 2006 <sup>9</sup>                                   | 2005             | X                     | X                      |              |              |              | X               | X                  | X                     | X                             |
| Zwar et al. 2012 <sup>10</sup>                                   | 2006             | X                     | X                      |              |              | X            |                 |                    |                       | X                             |
| Bucknall et al. 2012 <sup>11</sup>                               | 2007             | X                     |                        |              | X            |              | X               | X                  | X                     | X                             |
| Nguyen et al. 2013a <sup>12</sup>                                | 2007             |                       |                        | X            | X            | X            | X               | X                  |                       |                               |
| Nguyen et al. 2013b <sup>12</sup>                                | 2007             |                       |                        | X            | X            | X            | X               | X                  |                       |                               |
| Taylor et al. 2012 <sup>13</sup>                                 | 2007             | X                     |                        | X            |              | X            | X               | X                  |                       |                               |
| Trappenburg et al. 2011 <sup>14</sup>                            | 2008             |                       |                        |              | X            |              |                 |                    |                       |                               |
| <b>Total (N=19 interventions)</b>                                |                  | <b>15</b>             | <b>8</b>               | <b>9</b>     | <b>9</b>     | <b>7</b>     | <b>10</b>       | <b>9</b>           | <b>8</b>              | <b>11</b>                     |
| <i>Eligible studies that did not participate</i>                 |                  |                       |                        |              |              |              |                 |                    |                       |                               |
| Watson et al. 1997 <sup>15</sup>                                 | 1992             | X                     | X                      |              |              |              |                 |                    | X                     | X                             |
| Rea et al. 2004 <sup>16</sup>                                    | 1999             |                       | X                      |              |              | X            | X               |                    | X                     | X                             |
| Ninot et al. 2011 <sup>19</sup>                                  | 2002             |                       |                        | X            | X            |              | X               |                    |                       |                               |
| Wakabayashi et al. 2011 <sup>20</sup>                            | 2004             | X                     | X                      |              |              |              |                 |                    |                       | X                             |
| Khdour et al. 2009 <sup>18</sup>                                 | 2006             |                       |                        |              |              |              |                 |                    |                       |                               |
| Fan et al. 2012 <sup>21</sup>                                    | 2007             | X                     |                        | X            |              |              |                 |                    |                       | X                             |
| Wood-Baker et al. 2006 <sup>17</sup>                             | not reported     |                       |                        |              |              |              |                 | X                  | X                     | X                             |
| <b>Total (N=7 interventions)</b>                                 |                  | <b>3</b>              | <b>3</b>               | <b>2</b>     | <b>1</b>     | <b>1</b>     | <b>2</b>        | <b>1</b>           | <b>3</b>              | <b>5</b>                      |

X: characteristic present in intervention.

**Table S4: Sensitivity analysis on main outcomes by including published main effects of eligible studies without available individual patient data.**

|                                            | Effect | Primary analysis<br>(individual patient data only) |               |                         | Pooled analysis of individual<br>patient data and published effects |               |                         |
|--------------------------------------------|--------|----------------------------------------------------|---------------|-------------------------|---------------------------------------------------------------------|---------------|-------------------------|
|                                            |        | Stu-<br>dies                                       | Pa-<br>tients | Effect size<br>(95% CI) | Stu-<br>dies                                                        | Pa-<br>tients | Effect size<br>(95% CI) |
| <i>Health-related quality of life</i>      |        |                                                    |               |                         |                                                                     |               |                         |
| 6 months                                   | SMD    | 9                                                  | 1876          | 0.05 (-0.05;0.15)       | 13                                                                  | 2346          | 0.08 (-0.09;0.17)       |
| 12 months                                  | SMD    | 10                                                 | 2663          | 0.08 (0.00;0.16)        | 14                                                                  | 3503          | 0.08 (0.01;0.15)        |
| <i>All-cause hospitalisation</i>           |        |                                                    |               |                         |                                                                     |               |                         |
| Time-to-first-event                        | HR     | 4                                                  | 1559          | 0.80 (0.69;0.93)        | 5                                                                   | 1985          | 0.83 (0.72;0.95)        |
| 6 months                                   | RR     | 6                                                  | 2034          | 0.81 (0.67;0.97)        | Not possible to pool published data                                 |               |                         |
| 12 months                                  | RR     | 5                                                  | 1817          | 0.84 (0.73;0.96)        | 7                                                                   | 2378          | 0.84 (0.67;1.05)        |
| <i>Respiratory-related hospitalisation</i> |        |                                                    |               |                         |                                                                     |               |                         |
| Time-to-first-event                        | HR     | 6                                                  | 1872          | 0.79 (0.66;0.94)        | 7                                                                   | 2298          | 0.83 (0.70;0.97)        |
| 6 months                                   | RR     | 8                                                  | 2347          | 0.87 (0.69;1.09)        | Not possible to pool published data                                 |               |                         |
| 12 months                                  | RR     | 9                                                  | 2426          | 0.77 (0.64;0.93)        | 11                                                                  | 2987          | 0.78 (0.67;0.92)        |
| <i>Mortality</i>                           |        |                                                    |               |                         |                                                                     |               |                         |
| Time-to-event                              | HR     | 7                                                  | 2120          | 1.02 (0.76;1.37)        | 8                                                                   | 2546          | 1.19 (0.91;1.56)        |
| 6 months                                   | RR     | 9                                                  | 2490          | 1.06 (0.62;1.82)        | 10                                                                  | 2763          | 1.01 (0.75;1.35)        |
| 12 months                                  | RR     | 7                                                  | 2182          | 1.04 (0.64;1.69)        | 11                                                                  | 3055          | 1.30 (0.88;1.90)        |

CI: confidence interval, HR: hazard ratio, RR: risk ratio, SMD: standardised mean difference.

**Table S5: Risk of bias assessment of studies included in individual patient data meta-analysis.**

| <b>Study</b>                          | <b>Random concealed allocation to treatment</b> | <b>Intention-to-treat analysis</b> | <b>Absence of other sources of bias*</b> | <b>Comment</b>                                                    |
|---------------------------------------|-------------------------------------------------|------------------------------------|------------------------------------------|-------------------------------------------------------------------|
| Bischoff et al. 2012 <sup>6</sup>     | Low risk                                        | Low risk                           | Low risk                                 |                                                                   |
| Bourbeau et al. 2003 <sup>2</sup>     | Low risk                                        | Low risk                           | Low risk                                 |                                                                   |
| Bucknall et al. 2012 <sup>11</sup>    | Low risk                                        | Low risk                           | High risk                                | Selective drop-out (for health-related quality of life outcomes). |
| Casas et al. 2006 <sup>9</sup>        | Low risk                                        | Low risk                           | High risk                                | Baseline differences between intervention arms.                   |
| Coultas et al. 2005 <sup>4</sup>      | Low risk                                        | Unclear risk                       | Unclear risk                             |                                                                   |
| Effing et al. 2009 <sup>7</sup>       | Unclear risk                                    | Unclear risk                       | Low risk                                 |                                                                   |
| Gallefoss et al. 1999 <sup>1</sup>    | Low risk                                        | Unclear risk                       | Low risk                                 |                                                                   |
| McGeoch et al. 2006 <sup>5</sup>      | Unclear risk                                    | Unclear risk                       | High risk                                | Baseline differences between intervention arms.                   |
| Monninkhof et al. 2003 <sup>2</sup>   | Unclear risk                                    | Low risk                           | Low risk                                 |                                                                   |
| Nguyen et al. 2013 <sup>12</sup>      | Low risk                                        | Low risk                           | Low risk                                 |                                                                   |
| Rice et al. 2010 <sup>8</sup>         | Low risk                                        | Unclear risk                       | Low risk                                 |                                                                   |
| Taylor et al. 2012 <sup>13</sup>      | Low risk                                        | Unclear risk                       | Unclear risk                             |                                                                   |
| Trappenburg et al. 2011 <sup>14</sup> | Low risk                                        | Unclear risk                       | Low risk                                 |                                                                   |
| Zwar et al. 2012 <sup>10</sup>        | Low risk                                        | Low risk                           | High risk                                | Loss-to-follow-up.                                                |

Studies were assessed based on published reports.

\*E.g., high drop-out rates, risk of contamination, baseline imbalances between intervention arms.

## Supplemental references

1. Gallefoss F, Bakke PS, Kjaersgaard PK. Quality of life assessment after patient education in a randomized controlled study on asthma and chronic obstructive pulmonary disease. *Am J Respir Crit Care Med* 1999;159:812-817.
2. Bourbeau J, Julien M, Maltais F, Rouleau M, Beaupre A, Begin R, Renzi P, Nault D, Borycki E, Schwartzman K, Singh R, Collet JP. Reduction of hospital utilization in patients with chronic obstructive pulmonary disease: a disease-specific self-management intervention. *Arch Intern Med* 2003;163:585-591.
3. Monninkhof E, van der Valk P, van der Palen J, van Herwaarden C, Zielhuis G. Effects of a comprehensive self-management programme in patients with chronic obstructive pulmonary disease. *Eur Respir J* 2003;22:815-820.
4. Coultas D, Frederick J, Barnett B, Singh G, Wludyka P. A randomized trial of two types of nurse-assisted home care for patients with COPD. *Chest* 2005;128:2017-2024.
5. McGeoch GR, Willsman KJ, Dowson CA, Town GI, Frampton CM, McCartin FJ, Cook JM, Epton MJ. Self-management plans in the primary care of patients with chronic obstructive pulmonary disease. *Respirology* 2006;11:611-618.
6. Bischoff EW, Akkermans R, Bourbeau J, van WC, Vercoulen JH, Schermer TR. Comprehensive self management and routine monitoring in chronic obstructive pulmonary disease patients in general practice: randomised controlled trial. *BMJ* 2012;345:e7642.
7. Effing T, Kerstjens H, van der Valk P, Zielhuis G, van der Palen J. (Cost)-effectiveness of self-treatment of exacerbations on the severity of exacerbations in patients with COPD: the COPE II study. *Thorax* 2009;64:956-962.
8. Rice KL, Dewan N, Bloomfield HE, Grill J, Schult TM, Nelson DB, Kumari S, Thomas M, Geist LJ, Beaner C, Caldwell M, Niewoehner DE. Disease management program for chronic obstructive pulmonary disease: a randomized controlled trial. *Am J Respir Crit Care Med* 2010;182:890-896.
9. Casas A, Troosters T, Garcia-Aymerich J, Roca J, Hernández C, Alonso A, del Pozo F, de Toledo P, Antó JM, Rodríguez-Roisín R, Decramer M; members of the CHRONIC Project.. Integrated care prevents hospitalisations for exacerbations in COPD patients. *Eur Respir J* 2006;28:123-130.
10. Zwar NA, Hermiz O, Comino E, Middleton S, Vagholkar S, Xuan W, Wilson SF, Marks GB. Care of patients with a diagnosis of chronic obstructive pulmonary disease: a cluster randomised controlled trial. *Med J Aust* 2012;197:394-398.
11. Bucknall CE, Miller G, Lloyd SM, Cleland J, McCluskey S, Cotton M, Stevenson RD, Cotton P, McConnachie A. Glasgow supported self-management trial (GSuST) for patients with moderate to severe COPD: randomised controlled trial. *BMJ* 2012;344:e1060.
12. Nguyen HQ, Donesky D, Reinke LF, Wolpin S, Chyall L, Benditt JO, Paul SM, Carrieri-Kohlman V. Internet-Based Dyspnea Self-Management Support for Patients With Chronic Obstructive Pulmonary Disease. *J Pain Symptom Manage* 2013;46:43-55
13. Taylor SJC, Sohanpal R, Bremner SA, Devine A, McDaid D, Fernandez JL, Griffiths CJ, Eldridge S. Self-management support for moderate-to-severe chronic obstructive pulmonary disease: A pilot randomised controlled trial. *British Journal of General Practice* 2012;62:e687-e695.
14. Trappenburg JC, Monninkhof EM, Bourbeau J, Troosters T, Schrijvers AJ, Verheij TJ, Lammers JW. Effect of an action plan with ongoing support by a case manager on exacerbation-related outcome in patients with COPD: a multicentre randomised controlled trial. *Thorax* 2011;66:977-984.
15. Watson PB, Town GI, Holbrook N, Dwan C, Toop LJ, Drennan CJ. Evaluation of a self-management plan for chronic obstructive pulmonary disease. *Eur Respir J* 1997;10:1267-1271.
16. Rea H, McAuley S, Stewart A, Lamont C, Roseman P, Didsbury P. A chronic disease management programme can reduce days in hospital for patients with chronic obstructive pulmonary disease. *Intern Med J* 2004;34:608-614.



17. Wood-Baker R, McGlone S, Venn A, Walter EH. Written action plans in chronic obstructive pulmonary disease increase appropriate treatment for acute exacerbations. *Respirology* 2006;11:619-626.
18. Khmour MR, Kidney JC, Smyth BM, McElnay JC. Clinical pharmacy-led disease and medicine management programme for patients with COPD. *Br J Clin Pharmacol* 2009;68:588-598.
19. Ninot G, Moullec G, Picot MC, Jaussent A, Hayot M, Desplan M, Brun JF, Mercier J, Prefaut. Cost-saving effect of supervised exercise associated to COPD self-management education program. *Respir Med* 2011;105:377-385
20. Wakabayashi R, Motegi T, Yamada K, Ishii T, Jones RCM, Hyland ME, Gemma A, Kida K. Efficient integrated education for older patients with chronic obstructive pulmonary disease using the Lung Information Needs Questionnaire. *Geriatr Gerontol Int* 2011;11:422-430.
21. Fan VS, Gaziano JM, Lew R, Bourbeau J, Adams SG, Leatherman S, Thwin SS, Huang GD, Robbins R, Sriram PS, Sharafkhaneh A, Mador MJ, Sarosi G, Panos RJ, Rastogi P, Wagner TH, Mazzuca SA, Shannon C, Colling C, Liang MH, Stoller JK, Fiore L, Niewoehner DE. A comprehensive care management program to prevent chronic obstructive pulmonary disease hospitalizations: a randomized, controlled trial. *Ann Intern Med* 2012;156:673-683.
